# Supplementary material for: Ultra-Sensitive Flexible Pressure Sensor Based on Microstructured Electrode
Source: PubMed Central journal article supplement (PMC7013555; doi:10.3390/s20020371), 2020-01-09
Supplement: sensors-20-00371-s001.pdf [file sensors-20-00371-s001.pdf]

## Supplementary Materials

# Ultra-sensitive flexible pressure sensor based on microstructured electrode

Mengmeng Li <sup>1,†</sup>, Jiaming Liang <sup>2,†</sup>, Xudong Wang <sup>1</sup> and Min Zhang <sup>1,\*</sup>

<sup>1</sup> Shenzhen International Graduate School, Tsinghua University, Shenzhen, 518055, China; li-mm17@mails.tsinghua.edu.cn (M.L.); wangxd15@mails.tsinghua.edu.cn (X.W.)

<sup>2</sup> Tsinghua-Berkeley Shenzhen Institute, Tsinghua University, Shenzhen, 518055, China; liangjm16@mails.tsinghua.edu.cn

\* Correspondence: zhang.min@sz.tsinghua.edu.cn

† These authors contributed equally to this work.

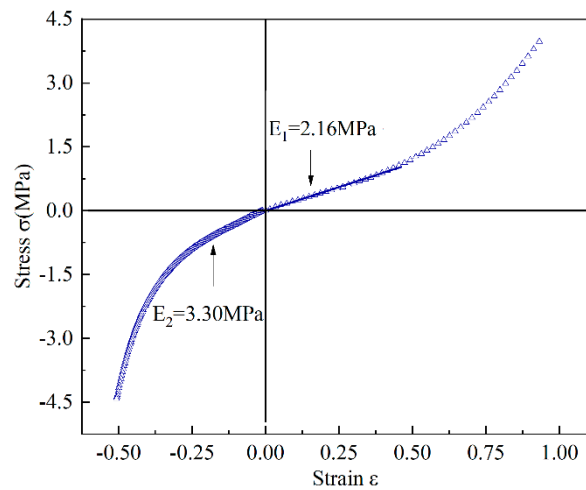

Figure S1 The measurement of stress-strain curve for 10:1 PDMS

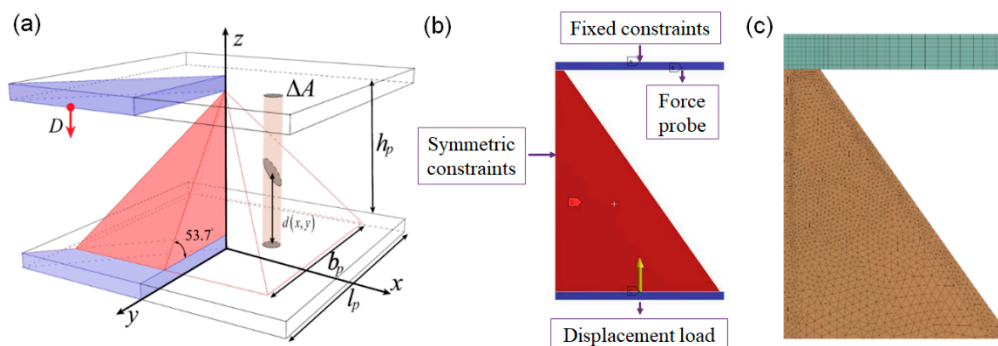

Figure S2 (a) Single pyramid microstructure capacitive sensor, (b) boundary conditions of the model, (c) the nonlinear mesh grid at the tip of the pyramid. Where  $b_p$  is the width of the micro-pyramid,  $l_p$  is the side length of the square electrode plate,  $h_p$  is the electrode distance.
